# Supplementary material for: Re-Patterning Sleep Architecture in Drosophila through Gustatory Perception and Nutritional Quality
Source: PubMed Central journal article supplement (PMC3342939; doi:10.1371/journal.pgen.1002668), 2012-05-03
Supplement: pgen.1002668.s005.pdf [file pgen.1002668.s005.pdf]

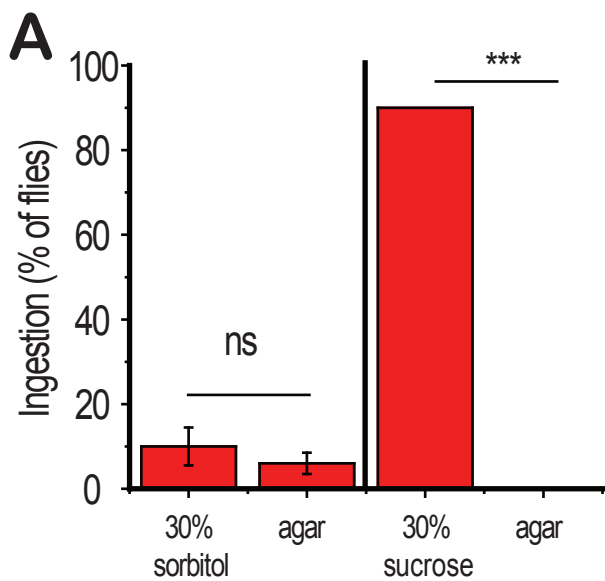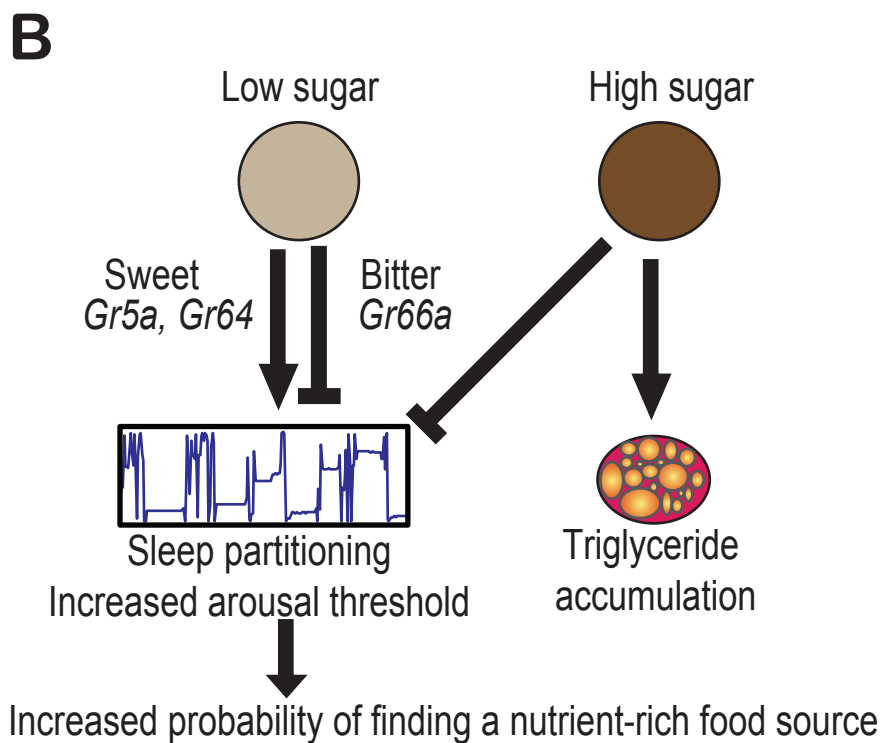

Figure S5
