# Supplementary material for: Re-Patterning Sleep Architecture in Drosophila through Gustatory Perception and Nutritional Quality
Source: PubMed Central journal article supplement (PMC3342939; doi:10.1371/journal.pgen.1002668), 2012-05-03
Supplement: pgen.1002668.s006.pdf [file pgen.1002668.s006.pdf]

|                                                                      | Trial 1 (n=16/group) |                        | Trial 2 (n=16/group) |                        | Trial 3 (n=16/group) |                      |
|----------------------------------------------------------------------|----------------------|------------------------|----------------------|------------------------|----------------------|----------------------|
| Sugar                                                                | 5%                   | 20%                    | 5%                   | 20%                    | 5%                   | 20%                  |
| Yeast                                                                | 5%                   | 20%                    | 5%                   | 20%                    | 5%                   | 20%                  |
| <b>Activity ± SEM (counts/min)</b>                                   |                      |                        |                      |                        |                      |                      |
| All                                                                  | 0.49 ± 0.05          | 0.61 ± 0.04            | 0.55 ± 0.05          | 0.52 ± 0.05            | 0.46 ± 0.04          | 0.41 ± 0.03          |
| Awake                                                                | 2.62 ± 0.24          | 2.31 ± 0.17            | <b>2.66 ± 0.14</b>   | <b>2.15 ± 0.11</b> *   | 2.37 ± 0.13          | 2.08 ± 0.09          |
| Night                                                                | 0.44 ± 0.06          | 0.57 ± 0.05            | 0.45 ± 0.05          | 0.36 ± 0.06            | 0.39 ± 0.05          | 0.33 ± 0.04          |
| Day                                                                  | 0.54 ± 0.05          | 0.67 ± 0.04            | 0.65 ± 0.06          | 0.67 ± 0.05            | 0.53 ± 0.04          | 0.49 ± 0.04          |
| <b>Sleep ± SEM (min/hr)</b>                                          |                      |                        |                      |                        |                      |                      |
| All                                                                  | 42.0 ± 2.0           | 37.6 ± 3.3             | 42.6 ± 1.4           | 40.5 ± 1.6             | 42.3 ± 2.2           | 41.6 ± 1.8           |
| Night                                                                | 43.9 ± 2.3           | 39.9 ± 3.1             | 47.2 ± 1.6           | 47.0 ± 2.0             | 45.8 ± 2.2           | 46.4 ± 1.8           |
| Day                                                                  | 40 ± 1.9             | 35.3 ± 3.6             | 37.9 ± 1.4           | 33.9 ± 1.5             | 38.5 ± 2.4           | 36.4 ± 1.9           |
| <b>Sleep bouts ± SEM (events/hr)</b>                                 |                      |                        |                      |                        |                      |                      |
| All                                                                  | <b>1.86 ± 0.17</b>   | <b>0.91 ± 0.16</b> *** | <b>1.64 ± 0.12</b>   | <b>1.1 ± 0.08</b> **   | <b>1.54 ± 0.13</b>   | <b>1.11 ± 0.08</b> * |
| Night                                                                | <b>1.85 ± 0.19</b>   | <b>0.92 ± 0.16</b> **  | <b>1.53 ± 0.14</b>   | <b>1.04 ± 0.11</b> *   | <b>1.38 ± 0.16</b>   | <b>0.97 ± 0.1</b> *  |
| Day                                                                  | <b>1.88 ± 0.16</b>   | <b>0.89 ± 0.16</b> *** | <b>1.77 ± 0.13</b>   | <b>1.16 ± 0.08</b> *** | <b>1.71 ± 0.12</b>   | <b>1.26 ± 0.08</b> * |
| <b>Rest ± SEM (min/hr)</b>                                           |                      |                        |                      |                        |                      |                      |
| All                                                                  | 5.37 ± 0.68          | 5.9 ± 1.17             | 4.96 ± 0.44          | 4.95 ± 0.48            | 5.44 ± 0.79          | 5.98 ± 0.74          |
| Night                                                                | 4.73 ± 0.82          | 5.03 ± 1.12            | 3.59 ± 0.45          | 3.32 ± 0.52            | 4.33 ± 0.77          | 4.04 ± 0.64          |
| Day                                                                  | 6.02 ± 0.62          | 6.81 ± 1.25            | 6.34 ± 0.56          | 6.61 ± 0.56            | 6.63 ± 0.91          | 8.07 ± 0.9           |
| <b>Brief awakening ± SEM (events/hr)</b>                             |                      |                        |                      |                        |                      |                      |
| All                                                                  | 2.2 ± 0.22           | 1.66 ± 0.34            | 1.99 ± 0.13          | 1.68 ± 0.16            | 2.02 ± 0.23          | 1.96 ± 0.25          |
| Night                                                                | 2.09 ± 0.26          | 1.49 ± 0.31            | 1.63 ± 0.15          | 1.24 ± 0.17            | 1.66 ± 0.22          | 1.34 ± 0.18          |
| Day                                                                  | 2.31 ± 0.22          | 1.83 ± 0.38            | 2.34 ± 0.19          | 2.12 ± 0.19            | 2.4 ± 0.28           | 2.62 ± 0.35          |
| <b>Wake ± SEM (min/hr)</b>                                           |                      |                        |                      |                        |                      |                      |
| All                                                                  | 12.6 ± 1.4           | 16.4 ± 2.2             | 12.5 ± 1.0           | 14.6 ± 1.3             | 12.3 ± 1.4           | 12.4 ± 1.1           |
| Night                                                                | 11.3 ± 1.6           | 15.0 ± 2.0             | 9.2 ± 1.2            | 9.7 ± 1.5              | 9.9 ± 1.5            | 9.5 ± 1.2            |
| Day                                                                  | 14.0 ± 1.4           | 17.9 ± 2.4             | <b>15.8 ± 1.1</b>    | <b>19.5 ± 1.2</b> *    | 14.9 ± 1.5           | 15.5 ± 1.2           |
| <b>Mean sleep bout length ± SEM (min)</b>                            |                      |                        |                      |                        |                      |                      |
| All                                                                  | 26.8 ± 3.9           | 52.2 ± 11.5            | <b>28.5 ± 2.6</b>    | <b>39.2 ± 3.7</b> *    | 30.8 ± 3.7           | 41.2 ± 3.9           |
| Night                                                                | 30.4 ± 5.4           | 53.7 ± 11.1            | 36.5 ± 4.2           | 51.2 ± 7.8             | 38.7 ± 6.2           | 49.7 ± 8.1           |
| Day                                                                  | 24.2 ± 3.1           | 51.7 ± 12.5            | <b>23.3 ± 2.1</b>    | <b>31.3 ± 2.1</b> *    | <b>26.1 ± 3.3</b>    | <b>37.6 ± 3.6</b> *  |
| <b>Latency to first sleep following light transition ± SEM (min)</b> |                      |                        |                      |                        |                      |                      |
| Night                                                                | 29.2 ± 6.0           | 59.9 ± 19.2            | 13.8 ± 1.9           | 46.5 ± 25.8            | 38.2 ± 7.6           | 66.4 ± 12.7          |
| Day                                                                  | 25.5 ± 4.3           | 80.2 ± 23.4            | 44.9 ± 9.7           | 69.1 ± 12.6            | 31.8 ± 14.8          | 65.2 ± 23.7          |
