# Supplementary material for: Re-Patterning Sleep Architecture in Drosophila through Gustatory Perception and Nutritional Quality
Source: PubMed Central journal article supplement (PMC3342939; doi:10.1371/journal.pgen.1002668), 2012-05-03
Supplement: pgen.1002668.s007.pdf [file pgen.1002668.s007.pdf]

|                                                            | Canton-S #1 (n=16 / group) |                    | Canton-S #2 (n=16 / group) |                    | yw #1 (n=16 / group) |             | yw #2 (n=16 / group) |                    | w <sup>1118</sup> #1 (n=16 / group) |                    | w <sup>1118</sup> #2 (n=16 / group) |                    |                    |                    |                    |                    |                    |   |
|------------------------------------------------------------|----------------------------|--------------------|----------------------------|--------------------|----------------------|-------------|----------------------|--------------------|-------------------------------------|--------------------|-------------------------------------|--------------------|--------------------|--------------------|--------------------|--------------------|--------------------|---|
| Sugar                                                      | 2.5%                       | 30%                | 2.5%                       | 30%                | 2.5%                 | 30%         | 2.5%                 | 30%                | 2.5%                                | 30%                | 2.5%                                | 30%                |                    |                    |                    |                    |                    |   |
| Yeast                                                      | 2.5%                       | 2.5%               | 2.5%                       | 2.5%               | 2.5%                 | 2.5%        | 2.5%                 | 2.5%               | 2.5%                                | 2.5%               | 2.5%                                | 2.5%               |                    |                    |                    |                    |                    |   |
| <b>Activity ± SEM (counts/min)</b>                         |                            |                    |                            |                    |                      |             |                      |                    |                                     |                    |                                     |                    |                    |                    |                    |                    |                    |   |
| All                                                        | 0.74 ± 0.06                | 0.92 ± 0.09        | 0.85 ± 0.06                | 0.92 ± 0.09        | 0.5 ± 0.04           | 0.54 ± 0.04 | 0.87 ± 0.06          | 0.81 ± 0.06        | 0.64 ± 0.04                         | 0.71 ± 0.05        | 1.19 ± 0.09                         | 1.1 ± 0.09         |                    |                    |                    |                    |                    |   |
| Awake                                                      | 2.66 ± 0.09                | 2.94 ± 0.13        | 2.75 ± 0.11                | 2.64 ± 0.08        | 2.36 ± 0.07          | 2.37 ± 0.1  | 2.76 ± 0.12          | 2.56 ± 0.08        | <b>2.69 ± 0.08</b>                  | <b>3.15 ± 0.09</b> | ***                                 | <b>3.63 ± 0.09</b> | <b>4.07 ± 0.17</b> | *                  |                    |                    |                    |   |
| Night                                                      | 0.61 ± 0.05                | 0.79 ± 0.11        | 0.71 ± 0.07                | 0.87 ± 0.1         | 0.43 ± 0.05          | 0.43 ± 0.05 | 0.67 ± 0.07          | 0.57 ± 0.04        | 0.6 ± 0.04                          | 0.66 ± 0.05        | 1.03 ± 0.12                         | 0.74 ± 0.08        |                    |                    |                    |                    |                    |   |
| Day                                                        | 0.87 ± 0.07                | 1.04 ± 0.09        | 0.99 ± 0.08                | 0.98 ± 0.09        | 0.57 ± 0.04          | 0.65 ± 0.05 | 1.08 ± 0.09          | 1.04 ± 0.11        | 0.68 ± 0.04                         | 0.77 ± 0.05        | 1.37 ± 0.08                         | 1.51 ± 0.11        |                    |                    |                    |                    |                    |   |
| <b>Sleep ± SEM (min/hr)</b>                                |                            |                    |                            |                    |                      |             |                      |                    |                                     |                    |                                     |                    |                    |                    |                    |                    |                    |   |
| All                                                        | 37.8 ± 1.4                 | 36.7 ± 1.6         | 36.4 ± 1.5                 | 34.2 ± 1.5         | 40.7 ± 1.3           | 39.6 ± 1.7  | 31.2 ± 1.9           | 32.4 ± 1.9         | 42.1 ± 0.8                          | 44.1 ± 1.0         | <b>35.6 ± 1.4</b>                   | <b>40.5 ± 1.3</b>  | *                  |                    |                    |                    |                    |   |
| Night                                                      | 43.2 ± 1.6                 | 42.5 ± 1.8         | 43.2 ± 1.6                 | 40.1 ± 2.1         | 45.2 ± 1.5           | 45.3 ± 1.6  | 38.6 ± 2.1           | 40.1 ± 1.9         | 44.9 ± 0.9                          | 46.7 ± 0.8         | <b>38.2 ± 2.0</b>                   | <b>45.0 ± 1.6</b>  | *                  |                    |                    |                    |                    |   |
| Day                                                        | 32.5 ± 1.7                 | 31.1 ± 2.3         | 29.3 ± 1.7                 | 28.1 ± 1.5         | 36.1 ± 1.5           | 33.8 ± 2.1  | 23.8 ± 2.4           | 24.7 ± 3.4         | 39.0 ± 0.9                          | 41.2 ± 1.3         | 32.6 ± 1.1                          | 35.4 ± 1.3         |                    |                    |                    |                    |                    |   |
| <b>Sleep bouts ± SEM (events/hr)</b>                       |                            |                    |                            |                    |                      |             |                      |                    |                                     |                    |                                     |                    |                    |                    |                    |                    |                    |   |
| All                                                        | <b>1.38 ± 0.08</b>         | <b>1.13 ± 0.06</b> | *                          | <b>1.44 ± 0.09</b> | <b>1.05 ± 0.09</b>   | **          | <b>1.59 ± 0.1</b>    | <b>1.19 ± 0.09</b> | **                                  | <b>1.81 ± 0.08</b> | <b>1.36 ± 0.1</b>                   | **                 | <b>2.17 ± 0.08</b> | <b>1.43 ± 0.06</b> | ***                | <b>1.73 ± 0.08</b> | <b>1.45 ± 0.07</b> | * |
| Night                                                      | <b>1.47 ± 0.13</b>         | <b>1.01 ± 0.07</b> | **                         | <b>1.27 ± 0.11</b> | <b>0.8 ± 0.1</b>     | **          | 1.42 ± 0.13          | 1.19 ± 0.1         | <b>1.5 ± 0.09</b>                   | <b>1.05 ± 0.12</b> | **                                  | <b>1.91 ± 0.12</b> | <b>1.17 ± 0.06</b> | ***                | <b>1.55 ± 0.13</b> | <b>1.14 ± 0.08</b> | *                  |   |
| Day                                                        | 1.3 ± 0.07                 | 1.25 ± 0.11        |                            | <b>1.61 ± 0.1</b>  | <b>1.3 ± 0.1</b>     | **          | <b>1.77 ± 0.11</b>   | <b>1.2 ± 0.1</b>   | ***                                 | <b>2.13 ± 0.13</b> | <b>1.67 ± 0.14</b>                  | *                  | <b>2.45 ± 0.05</b> | <b>1.71 ± 0.08</b> | ***                | 1.94 ± 0.08        | 1.79 ± 0.09        |   |
| <b>Rest ± SEM (min/hr)</b>                                 |                            |                    |                            |                    |                      |             |                      |                    |                                     |                    |                                     |                    |                    |                    |                    |                    |                    |   |
| All                                                        | 5.14 ± 0.35                | 4.38 ± 0.47        |                            | 4.8 ± 0.34         | 5.21 ± 0.39          |             | 6.23 ± 0.58          | 6.14 ± 0.64        | 8.83 ± 0.64                         | 8.22 ± 0.76        | <b>3.42 ± 0.31</b>                  | <b>2.17 ± 0.2</b>  | **                 | <b>4.38 ± 0.38</b> | <b>3.05 ± 0.34</b> | *                  |                    |   |
| Night                                                      | <b>4.23 ± 0.46</b>         | <b>2.74 ± 0.37</b> | *                          | 2.79 ± 0.27        | 2.93 ± 0.45          |             | 4.45 ± 0.52          | 4.23 ± 0.47        | 5.49 ± 0.64                         | 5.59 ± 0.73        | <b>2.47 ± 0.29</b>                  | <b>1.53 ± 0.16</b> | *                  | <b>3.57 ± 0.5</b>  | <b>2.16 ± 0.39</b> | *                  |                    |   |
| Day                                                        | 6.03 ± 0.38                | 5.97 ± 0.66        |                            | 6.88 ± 0.49        | 7.58 ± 0.43          |             | 8.05 ± 0.77          | 8.1 ± 0.9          | 12.2 ± 0.83                         | 10.89 ± 1.35       | <b>4.48 ± 0.44</b>                  | <b>2.88 ± 0.3</b>  | **                 | <b>5.31 ± 0.42</b> | <b>4.07 ± 0.41</b> | *                  |                    |   |
| <b>Brief awakenings ± SEM (events/hr)</b>                  |                            |                    |                            |                    |                      |             |                      |                    |                                     |                    |                                     |                    |                    |                    |                    |                    |                    |   |
| All                                                        | <b>2 ± 0.14</b>            | <b>1.49 ± 0.14</b> | *                          | 1.4 ± 0.07         | 1.11 ± 0.13          |             | 2.49 ± 0.2           | 1.98 ± 0.18        | <b>3.18 ± 0.16</b>                  | <b>2.49 ± 0.23</b> | *                                   | <b>1.14 ± 0.11</b> | <b>0.56 ± 0.06</b> | ***                | <b>1.44 ± 0.11</b> | <b>1.07 ± 0.09</b> | *                  |   |
| Night                                                      | <b>1.95 ± 0.18</b>         | <b>1.1 ± 0.13</b>  | ***                        | <b>1.02 ± 0.08</b> | <b>0.55 ± 0.09</b>   | ***         | 1.85 ± 0.2           | 1.52 ± 0.15        | 1.98 ± 0.14                         | 1.52 ± 0.18        | <b>0.92 ± 0.11</b>                  | <b>0.56 ± 0.06</b> | **                 | 1 ± 0.14           | 0.66 ± 0.09        |                    |                    |   |
| Day                                                        | 2.06 ± 0.16                | 1.88 ± 0.19        |                            | 1.8 ± 0.1          | 1.68 ± 0.18          |             | 3.14 ± 0.27          | 2.45 ± 0.24        | 4.4 ± 0.25                          | 3.47 ± 0.39        | <b>1.37 ± 0.14</b>                  | <b>0.57 ± 0.08</b> | ***                | <b>1.95 ± 0.13</b> | <b>1.55 ± 0.13</b> | *                  |                    |   |
| <b>Wake ± SEM (min/hr)</b>                                 |                            |                    |                            |                    |                      |             |                      |                    |                                     |                    |                                     |                    |                    |                    |                    |                    |                    |   |
| All                                                        | 17.0 ± 1.26                | 18.9 ± 1.5         |                            | 18.8 ± 1.2         | 20.6 ± 1.4           |             | 13.1 ± 0.9           | 14.3 ± 1.2         | 20.0 ± 1.5                          | 19.4 ± 1.4         | 14.5 ± 0.7                          | 13.8 ± 0.8         | <b>20.0 ± 1.3</b>  | <b>16.4 ± 1.0</b>  | *                  |                    |                    |   |
| Night                                                      | 12.5 ± 1.2                 | 14.8 ± 1.7         |                            | 14.0 ± 1.4         | 17.0 ± 1.8           |             | 10.4 ± 1.1           | 10.5 ± 1.2         | 15.9 ± 1.6                          | 14.3 ± 1.3         | 12.7 ± 0.8                          | 11.8 ± 0.7         | <b>18.2 ± 1.7</b>  | <b>12.8 ± 1.2</b>  | *                  |                    |                    |   |
| Day                                                        | 21.4 ± 1.7                 | 22.94 ± 1.9        |                            | 23.8 ± 1.4         | 24.3 ± 1.5           |             | 15.8 ± 0.9           | 18.1 ± 1.5         | 24.0 ± 1.9                          | 24.5 ± 2.4         | 16.5 ± 0.7                          | 15.9 ± 1.1         | 22.1 ± 1.2         | 20.5 ± 0.9         |                    |                    |                    |   |
| <b>Mean sleep bout length ± SEM (min)</b>                  |                            |                    |                            |                    |                      |             |                      |                    |                                     |                    |                                     |                    |                    |                    |                    |                    |                    |   |
| All                                                        | 29.7 ± 2.8                 | 33.8 ± 2.4         |                            | <b>26.8 ± 2.0</b>  | <b>35.2 ± 2.5</b>    | *           | 28.2 ± 3.1           | 37.1 ± 4.1         | 17.3 ± 1.3                          | 28.4 ± 5.9         | <b>19.9 ± 1.1</b>                   | <b>32.1 ± 2.0</b>  | ***                | <b>21.4 ± 1.6</b>  | <b>29.9 ± 2.7</b>  | *                  |                    |   |
| Night                                                      | 34.9 ± 4.7                 | 45.8 ± 4.2         |                            | <b>38.8 ± 4.6</b>  | <b>57.1 ± 5.2</b>    | *           | 37.3 ± 4.6           | 43.0 ± 4.9         | <b>27.2 ± 2.5</b>                   | <b>47.0 ± 7.3</b>  | **                                  | <b>25.4 ± 2.3</b>  | <b>41.9 ± 2.9</b>  | ***                | <b>27.8 ± 3.3</b>  | <b>43.9 ± 4.7</b>  | **                 |   |
| Day                                                        | 26.4 ± 2.5                 | 26.5 ± 2.3         |                            | 18.8 ± 1.3         | 22.5 ± 1.4           |             | <b>22.4 ± 2.4</b>    | <b>33.0 ± 4.3</b>  | *                                   | 10.9 ± 0.8         | 18.1 ± 5.7                          | <b>16.0 ± 0.6</b>  | <b>25.1 ± 1.7</b>  | ***                | 17.0 ± 0.87        | 21.0 ± 1.9         |                    |   |
| <b>Latency to sleep after light transition ± SEM (min)</b> |                            |                    |                            |                    |                      |             |                      |                    |                                     |                    |                                     |                    |                    |                    |                    |                    |                    |   |
| Night                                                      | 49.9 ± 3.8                 | 60.5 ± 3.8         |                            | <b>26.6 ± 2.7</b>  | <b>34.0 ± 2.1</b>    | *           | 35.4 ± 5.6           | 25.7 ± 3.2         | 57.4 ± 7.2                          | 58.5 ± 7.8         | 15.6 ± 1.4                          | 18.4 ± 1.2         | <b>50.5 ± 8.1</b>  | <b>27.3 ± 3.2</b>  | *                  |                    |                    |   |
| Day                                                        | 98.4 ± 10.6                | 128.4 ± 17.1       |                            | 55.4 ± 8.0         | 77.2 ± 13.6          |             | <b>32.1 ± 5.9</b>    | <b>82.2 ± 19.2</b> | *                                   | <b>67 ± 10.3</b>   | <b>132 ± 17.6</b>                   | **                 | 20.2 ± 3.2         | 27.8 ± 4.7         | 49.6 ± 5.0         | 43.9 ± 5.5         |                    |   |
